# Supplementary material
Source: PubMed Central journal article supplement (PMC3008768)

## Supporting Information

Capillary UHPLC with Elevated Temperature for Sub-One Minute Separations of Basal Serotonin in Sub-Microliter Brain Microdialysate Samples

<sup>1</sup>Yansheng Liu, <sup>1</sup>Jing Zhang, <sup>1</sup>Xiaomi Xu, <sup>2,3</sup>Moe K. Zhao, <sup>2,3</sup>Anne M. Andrews,  
and <sup>1</sup>Stephen G. Weber\*

<sup>1</sup>Department of Chemistry, University of Pittsburgh, Pittsburgh, PA, <sup>2</sup>Department of Veterinary & Biomedical Sciences, Pennsylvania State University, University Park, PA, and <sup>3</sup>Semel Institute of Neuroscience & Human Behavior, University of California, Los Angeles

**Avoiding interferences from unknown impurities by changing operation conditions.** Column: 100  $\mu\text{m}$  i.d.  $\times$  5.8 cm length, 1.7  $\mu\text{m}$  BEH C18 bonded stationary phase. Flow rate: 3.9  $\mu\text{L}/\text{min}$ . Mobile phase: pH 4.0 aqueous buffer containing 100 mM sodium acetate, 0.15 mM disodium EDTA, and 10 mM SOS, with 4% (v/v) acetonitrile.

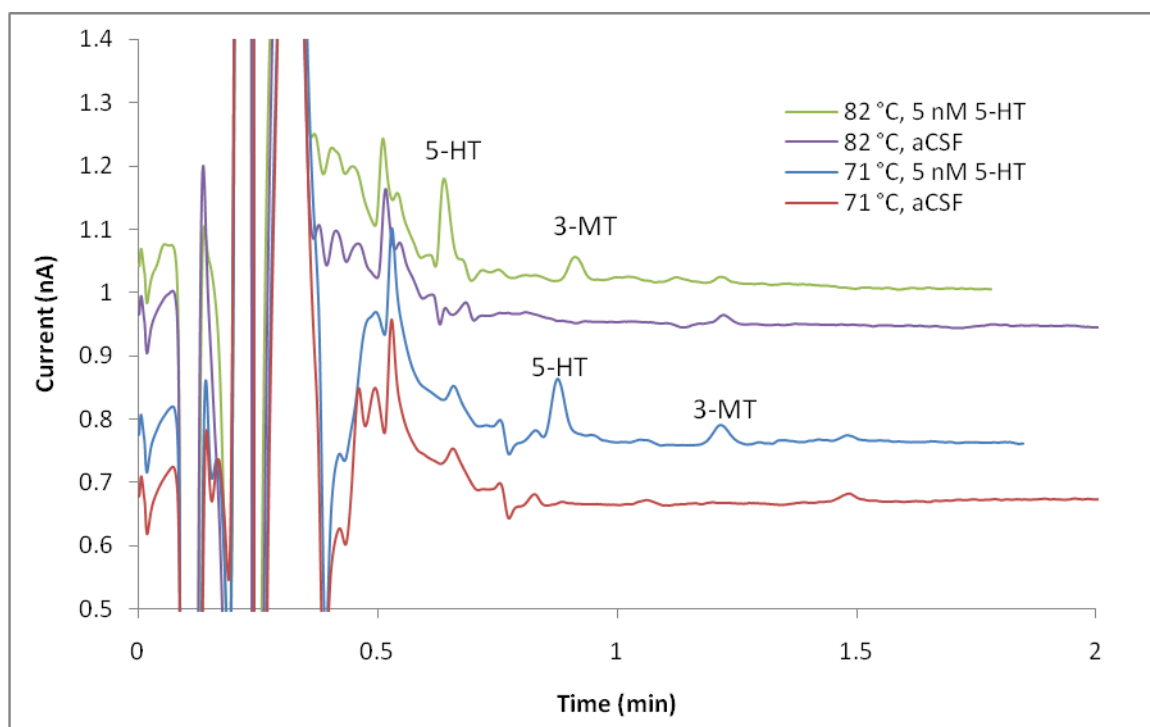

**Figure 2. Fast analysis of microdialysis samples for serotonin by capillary HPLC with PFET detection.** Column: 100  $\mu\text{m}$  i.d.  $\times$  5.1 cm length, 1.7  $\mu\text{m}$  BEH C18 bonded stationary phase. Temperature: 70  $^{\circ}\text{C}$ . PFET detector. Flow rate: 4  $\mu\text{L}/\text{min}$ . Mobile phase: pH 4.0 aqueous buffer containing 100 mM sodium acetate, 0.15 mM disodium EDTA, and 18 mM SOS, with 4% (v/v) acetonitrile. Electrochemical detection at +0.7 V. Samples: 1. aCSF, 2. 0.5 nM 5-HT, 3. Baseline microdialysate sample collected at 3  $\mu\text{L}/\text{min}$ , 4. Baseline microdialysate sample collected at 1  $\mu\text{L}/\text{min}$ . Dialysates were collected from the hippocampus in mice lacking serotonin transporter expression (SERT $^{-/-}$ ), and had been frozen at -80  $^{\circ}\text{C}$  for 3 weeks before HPLC analysis.

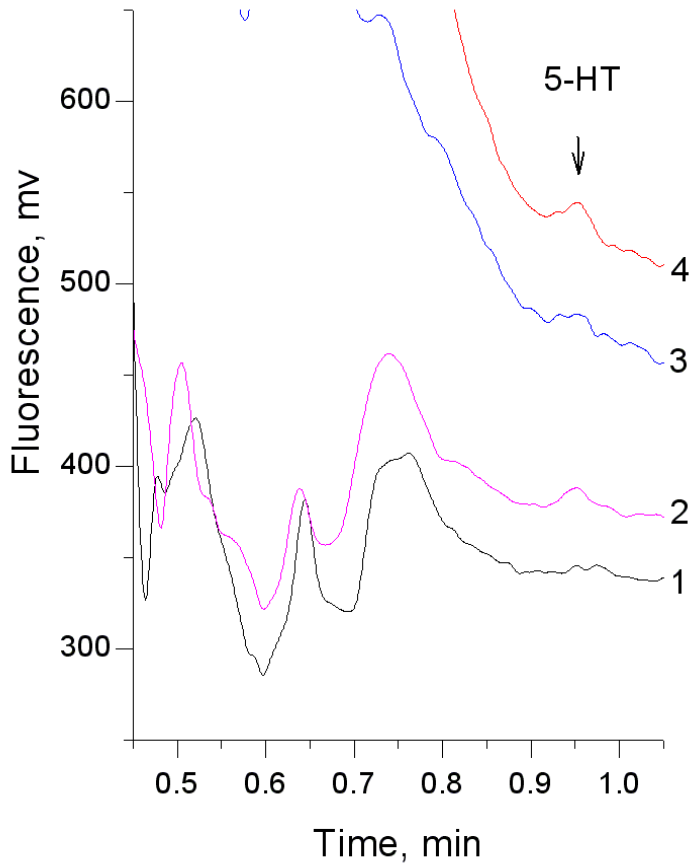

Supplement: NIHMS251699-supplement-1_si_001.pdf [file NIHMS251699-supplement-1_si_001.pdf]
